# Supplementary material
Source: Springer Nature journal article supplement (https://www.springermedizin.de/resource/supplementary/12911_2010_389_MOESM5_ESM.pdf/9525626)
Supplement: MOESM5 [file 9525626]

### Change in percentage of patients achieving treatment targets at clinics with on-site patient report card distribution compared to control clinics

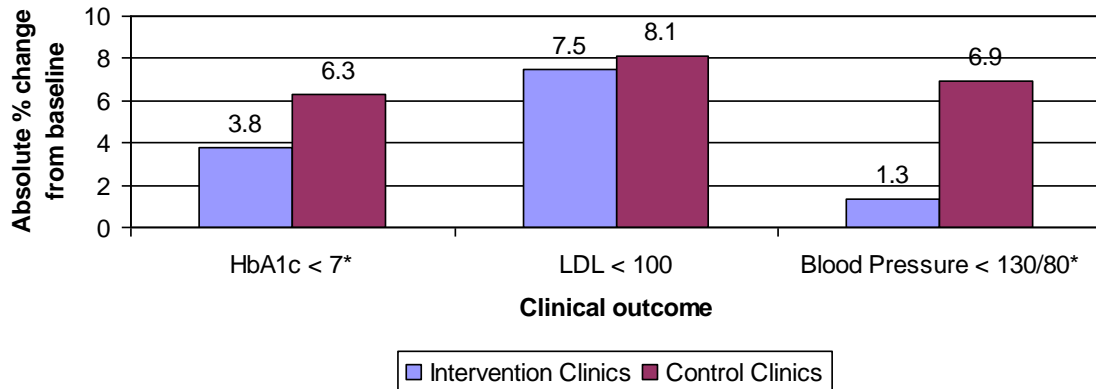

### Change in percentage of patients achieving treatment targets at clinics with enhanced provider report cards compared to standard provider report card clinics

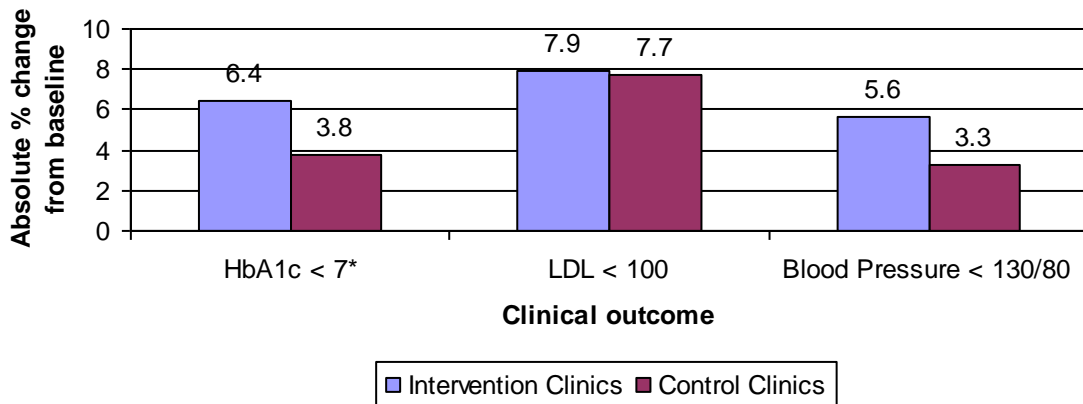

\* $p$ -value < 0.01
